# Supplementary material
Source: PubMed Central journal article supplement (PMC10518216)
Supplement: NIHMS1927755-supplement-Supplementary_Tables.pdf [file NIHMS1927755-supplement-Supplementary_Tables.pdf]

**Table S1: Results of Statistical Analysis**

| Variable      | Participant Groups                  |                          |                          |                          |                          |                          |                          |
|---------------|-------------------------------------|--------------------------|--------------------------|--------------------------|--------------------------|--------------------------|--------------------------|
|               | HC<br>(n=125)                       | PLW-UVD(I)<br>(n=49)     | PLW-UVD(C)<br>(n=45)     | PLW-Mild-MS(L)<br>(n=64) | PLW-Mild-MS(H)<br>(n=79) | PLW-Mod-MS(L)<br>(n=64)  | PLW-Mod-MS(H)<br>(n=79)  |
|               | <b>median (interquartile range)</b> |                          |                          |                          |                          |                          |                          |
| VOR Gain      | 0.97<br>(0.90 - 1.02)               | 0.35<br>(0.31 - 0.40)    | 0.80<br>(0.75 - 0.84)    | 0.90<br>(0.84 - 0.94)    | 0.95<br>(0.90 - 1.00)    | 0.43<br>(0.29 - 0.59)    | 0.66<br>(0.54 - 0.78)    |
| GPE           | 0.5<br>(-0.3 - 0.9)                 | 7.0<br>(6.0 - 8.2)       | 2.4<br>(2.0 - 3.1)       | 1.2<br>(0.6 - 2.2)       | 0.5<br>(0.0 - 1.2)       | 9.5<br>(7.6 - 11.7)      | 4.9<br>(3.0 - 7.7)       |
| Frequency     | 1.0<br>(0.0 - 1.0)                  | 2.0<br>(1.0 - 2.0)       | 1.0<br>(1.0 - 2.0)       | 1.0<br>(1.0 - 2.0)       | 1.0<br>(1.0 - 2.0)       | 1.0<br>(0.8 - 2.0)       | 2.0<br>(1.0 - 2.5)       |
| Latency       | 151.0<br>(72.0 - 261.0)             | 178.7<br>(159.0 - 198.0) | 166.7<br>(101.5 - 196.0) | 244.0<br>(195.5 - 293.0) | 230.0<br>(183.0 - 305.0) | 168.0<br>(113.5 - 217.0) | 240.0<br>(193.3 - 291.3) |
| Peak Velocity | 99.9<br>(48.0 - 141.8)              | 169.7<br>(127.8 - 209.9) | 96.7<br>(73.2 - 149.1)   | 78.2<br>(54.3 - 113.3)   | 58.7<br>(19.9 - 101.3)   | 63.0<br>(49.7 - 74.5)    | 159.8<br>(122.9 - 221.4) |

**Continued on next page.**

These data for vestibular and compensatory oculomotor metrics are presented as median (inter-quartile range). HC = healthy control. PLW-UVD(I) = people living with unilateral deafferentation, ipsilesional side. PLW-UVD(C) = people living with unilateral deafferentation, contralesional side. PLW-Mild-MS(L) = people living with mild multiple sclerosis, side with lower VOR gain. PLW-Mild-MS(H) = people living with mild multiple sclerosis, side with higher VOR gain. PLW-mod-MS(L) = people living with moderate multiple sclerosis, side with lower VOR gain. PLW-moderate-MS(H) = people living with moderate multiple sclerosis, side with higher VOR gain. VOR = vestibulo-ocular reflex. GPE = gaze position error.

**Table S1: Results of Statistical Analysis (Continued)**

| Variable      | Pairwise Comparisons                                                                        |             |             |                 |                 |                |                |                     |                     |                     |                     |                    |                    |                    |                    |                         |                        |                        |                        |                        |        |
|---------------|---------------------------------------------------------------------------------------------|-------------|-------------|-----------------|-----------------|----------------|----------------|---------------------|---------------------|---------------------|---------------------|--------------------|--------------------|--------------------|--------------------|-------------------------|------------------------|------------------------|------------------------|------------------------|--------|
|               | Overall                                                                                     | HC v UVD(I) | HC v UVD(C) | HC v Mild-MS(L) | HC v Mild-MS(H) | HC v Mod-MS(L) | HC v Mod-MS(H) | UVD(I) v Mild-MS(L) | UVD(I) v Mild-MS(H) | UVD(C) v Mild-MS(L) | UVD(C) v Mild-MS(H) | UVD(I) v Mod-MS(L) | UVD(I) v Mod-MS(H) | UVD(C) v Mod-MS(L) | UVD(C) v Mod-MS(H) | Mild-MS(L) v Mild-MS(H) | Mild-MS(L) v Mod-MS(L) | Mild-MS(L) v Mod-MS(H) | Mild-MS(H) v Mod-MS(L) | Mild-MS(H) v Mod-MS(H) |        |
|               | p-values from a Kruskal-Wallis test with pairwise comparisons, adjusted using Holm's method |             |             |                 |                 |                |                |                     |                     |                     |                     |                    |                    |                    |                    |                         |                        |                        |                        |                        |        |
| VOR Gain      | <0.001                                                                                      | <0.001      | <0.001      | <0.001          | 0.338           | <0.001         | <0.001         | <0.001              | <0.001              | <0.001              | <0.001              | 0.248              | <0.001             | <0.001             | <0.001             | <0.001                  | <0.001                 | <0.001                 | <0.001                 | <0.001                 | <0.001 |
| GPE           | <0.001                                                                                      | <0.001      | <0.001      | <0.001          | 0.428           | <0.001         | <0.001         | <0.001              | <0.001              | <0.001              | <0.001              | <0.001             | 0.004              | <0.001             | <0.001             | <0.001                  | <0.001                 | <0.001                 | <0.001                 | <0.001                 | <0.001 |
| Frequency     | <0.001                                                                                      | <0.001      | 0.003       | <0.001          | 0.074           | 0.001          | <0.001         | 0.032               | <0.001              | >0.999              | 0.74                | 0.57               | >0.999             | >0.999             | 0.086              | 0.329                   | >0.999                 | 0.013                  | 0.609                  | <0.001                 | 0.183  |
| Latency       | <0.001                                                                                      | >0.999      | >0.999      | <0.001          | 0.008           | >0.999         | <0.001         | <0.001              | 0.005               | <0.001              | 0.011               | >0.999             | <0.001             | >0.999             | <0.001             | >0.999                  | <0.001                 | >0.999                 | 0.005                  | >0.999                 | <0.001 |
| Peak Velocity | <0.001                                                                                      | <0.001      | >0.999      | 0.695           | 0.02            | 0.003          | <0.001         | <0.001              | <0.001              | 0.247               | 0.006               | <0.001             | >0.999             | <0.001             | <0.001             | 0.107                   | 0.065                  | <0.001                 | >0.999                 | <0.001                 | <0.001 |

HC = healthy control. PLW-UVD(I) = people living with unilateral deafferentation, ipsilesional side. PLW-UVD(C) = people living with unilateral deafferentation, contralesional side. PLW-Mild-MS(L) = people living with mild multiple sclerosis, side with lower VOR gain. PLW-Mild-MS(H) = people living with mild multiple sclerosis, side with higher VOR gain. PLW-mod-MS(L) = people living with moderate multiple sclerosis, side with lower VOR gain. PLW-moderate-MS(H) = people living with moderate multiple sclerosis, side with higher VOR gain. VOR = vestibulo-ocular reflex. GPE = gaze position error.
